# Supplementary material
Source: HighWire-hosted journal article supplement (https://jnm.snmjournals.org/highwire/filestream/95414/field_highwire_adjunct_files/0/217885_Supplemental_Data.pdf)
Supplement: 217885_Supplemental_Data.pdf [file 217885_Supplemental_Data.pdf]

Supplemental Table 1. Univariate and multivariate linear regression analysis to examine association of variables with maximum per patient 1h post injection target to background uptake measurements. Both multivariate models with: LDL levels, segment involvement scores, presence of multivessel disease, coronary calcium scores and quantitative stenosis. Model 1 additionally includes lipid lowering treatment; Model 2 includes partially calcified plaques.

| Variables                  | Univariate                      |         | Multivariable – Model 1<br>(included: lipid lowering treatment) |         | Multivariable – Model 2<br>(included: plaque composition - mixed) |         |
|----------------------------|---------------------------------|---------|-----------------------------------------------------------------|---------|-------------------------------------------------------------------|---------|
|                            | Relative change in TBR (95% CI) | P value | Relative change in TBR (95% CI)                                 | P value | Relative change in TBR (95% CI)                                   | P value |
| LDL                        | 0.001 (-0.001-0.001)            | 0.97    | 0.001 (-0.006-0.005)                                            | 0.74    | 0.001 (-0.005-0.006)                                              | 0.80    |
| Lipid lowering treatment   | -0.30 (-0.60—0.004)             | 0.047   | -0.331 (-0.68-0.023)                                            | 0.064   |                                                                   |         |
| Segment involvement score  | 0.04 (-0.05 – 0.67)             | 0.22    | 0.01 (-0.06-0.02)                                               | 0.53    | 0.02 (-0.03-0.06)                                                 | 0.49    |
| Multivessel disease        | 0.05 (-0.21-0.31)               | 0.30    | 0.09 (-0.43-0.27)                                               | 0.65    | 0.33 (-0.01-0.76)                                                 | 0.11    |
| Coronary calcium score     | 0.01 (0.001-0.02)               | 0.39    | 0.01 (-0.01-0.02)                                               | 0.43    | 0.01 (-0.01-0.02)                                                 | 0.55    |
| Stenosis                   | 0.001 (-0.007 – 0.10)           | 0.75    | 0.002 (-0.007-0.011)                                            | 0.66    | 0.003 (-0.005-0.12)                                               | 0.44    |
| Partially calcified plaque | 0.30 (0.03-0.57)                | 0.030   |                                                                 |         | 0.56 (0.1-1.0)                                                    | 0.020   |

CI: confidence interval, LDL: low density lipoprotein, TBR: maximum target to background ratios.

Supplemental Table 2. Univariate and multivariate linear regression analysis to examine association of variables with maximum per patient 3h post injection target to background uptake measurements. Both multivariate models with: LDL levels, segment involvement scores, presence of multivessel disease, coronary calcium scores and quantitative stenosis. Model 1 additionally includes lipid lowering treatment; Model 2 includes partially calcified plaques.

| Variables                  | Univariate                      |         | Multivariable – Model 1<br>(included: lipid lowering treatment) |         | Multivariable – Model 2<br>(included: plaque composition - mixed) |         |
|----------------------------|---------------------------------|---------|-----------------------------------------------------------------|---------|-------------------------------------------------------------------|---------|
|                            | Relative change in TBR (95% CI) | P value | Relative change in TBR (95% CI)                                 | P value | Relative change in TBR (95% CI)                                   | P value |
| LDL                        | 0.004 (-0.007-0.015)            | 0.43    | 0.002 (-0.01-0.01)                                              | 0.66    | 0.01(-0.001-0.015)                                                | 0.15    |
| Lipid lowering treatment   | -0.32 (-0.61-0.03)              | 0.041   | -0.36 (-1.04-0.012)                                             | 0.079   |                                                                   |         |
| Segment involvement score  | 0.012 (-0.08-0.10)              | 0.78    | 0.04 (-0.05-0.13)                                               | 0.33    | 0.03 (-0.04-0.09)                                                 | 0.40    |
| Multivessel disease        | 0.09 (-0.61-0.79)               | 0.21    | 0.11 (-0.56-0.78)                                               | 0.32    | 0.67 (0.2-1.33)                                                   | 0.02    |
| Coronary calcium score     | 0.001 (-0.01-0.011)             | 0.37    | 0.001(-0.002-0.003)                                             | 0.77    | 0.001 (-0.001-0.002)                                              | 0.79    |
| Stenosis                   | 0.12 (-0.05-0.029)              | 0.15    | 0.1 (-0.01-0.03)                                                | 0.19    | 0.02 (0.001-0.03)                                                 | 0.11    |
| Partially calcified plaque | 0.79 (0.27-1.30)                | 0.005   |                                                                 |         | 1.3 (0.7-1.9)                                                     | <0.001  |

CI: confidence interval, LDL: low density lipoprotein, TBR: maximum target to background ratios.
